# Supplementary material for: New insight into the polymerization mechanism of 1,3-dienes cationic polymerization. IV. Mechanism of unsaturation loss in the polymerization of isoprene
Source: Royal Society of Chemistry journal article supplement (doi:10.1039/c6py01736c), 2016-12-21
Supplement: c6py01736c1.pdf [file c6py01736c1.pdf]

## Supplementary information

### **A new insight into the polymerization mechanism of 1,3-dienes cationic polymerization. IV. Mechanism of unsaturation loss in the polymerization of isoprene**

Victor A. Rozentsvet,<sup>\*a</sup> Valery G. Kozlov,<sup>a</sup> Nelly A. Sablina,<sup>a</sup> Olesya A. Stotskaya,<sup>a</sup> Frederic Peruch<sup>b</sup> and Sergei V. Kostjuk<sup>c</sup>

<sup>a</sup> Institute of Ecology of the Volga River Basin, Russian Academy of Science, 10 Komzina St, Togliatti, 445003, Russia. E-mai: [rozentsvet@mail.ru](mailto:rozentsvet@mail.ru); Fax: +78482489504; Tel: +78482489174

<sup>b</sup> LCPO,UMR 5629, CNRS/UB1/IPB, University of Bordeaux, 16 avenue Pey Berland, Pessac Cedex, 33607, France

<sup>c</sup> Research Institute for Physical Chemical Problems of the Belarusian State University, 14 Leningradskaya St, Minsk, 220006, Belarus

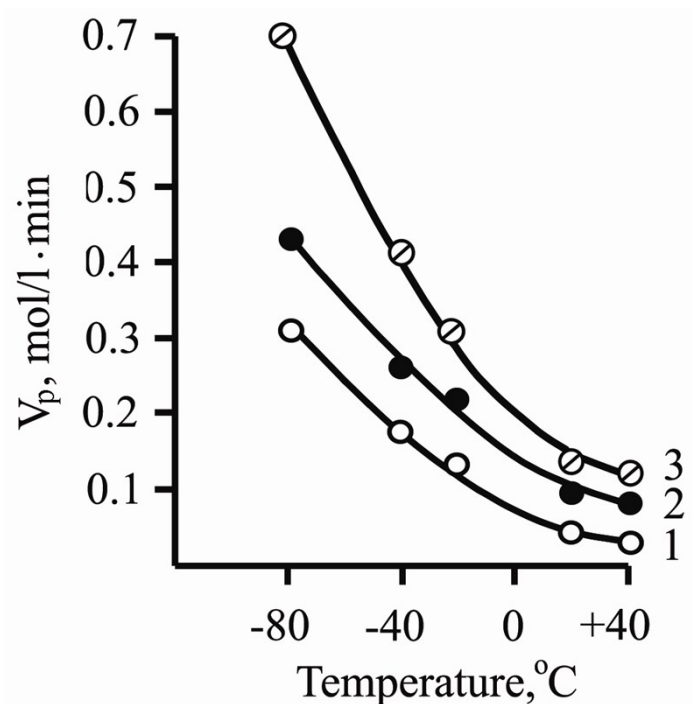

**Fig. S1** Dependence of the reaction rate ( $V_p$  – the rate for first 5 min of the process) on temperature for the isoprene polymerization with  ${}^t\text{BuCl}/\text{TiCl}_4$  initiating system in  $\text{CH}_2\text{Cl}_2$  at different  ${}^t\text{BuCl}/\text{TiCl}_4$  molar ratios:  $[\text{C}_5\text{H}_8]=4.0 \text{ M}$ ;  $[\text{TiCl}_4]=1.5 \cdot 10^{-2} \text{ M}$ . Ratio of  ${}^t\text{BuCl}$  to  $\text{TiCl}_4$ : 20 (1), 100 (2) and 300 (3).

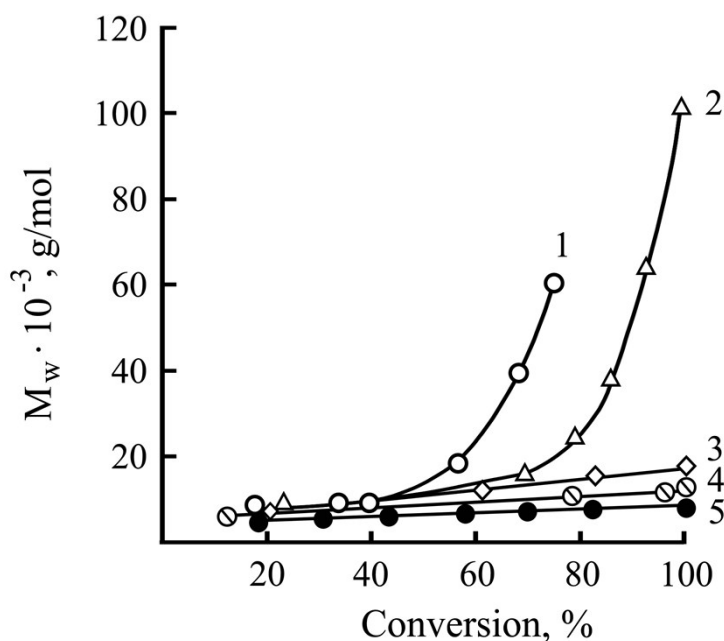

**Fig. S2** The weight average molecular weight vs. conversion plots for the isoprene polymerization with  ${}^t\text{BuCl}/\text{TiCl}_4$  initiating system in  $\text{CH}_2\text{Cl}_2$  at  $20 \text{ }^{\circ}\text{C}$  at different  ${}^t\text{BuCl}/\text{TiCl}_4$  molar ratios:  $[\text{C}_5\text{H}_8]=4.0 \text{ M}$ ;  $[\text{TiCl}_4]=1.5 \cdot 10^{-2} \text{ M}$ . Ratio of  ${}^t\text{BuCl}$  to  $\text{TiCl}_4$ : 5.0 (1), 20.0 (2), 50.0 (3), 100.0 (4) and 300.0 (5).

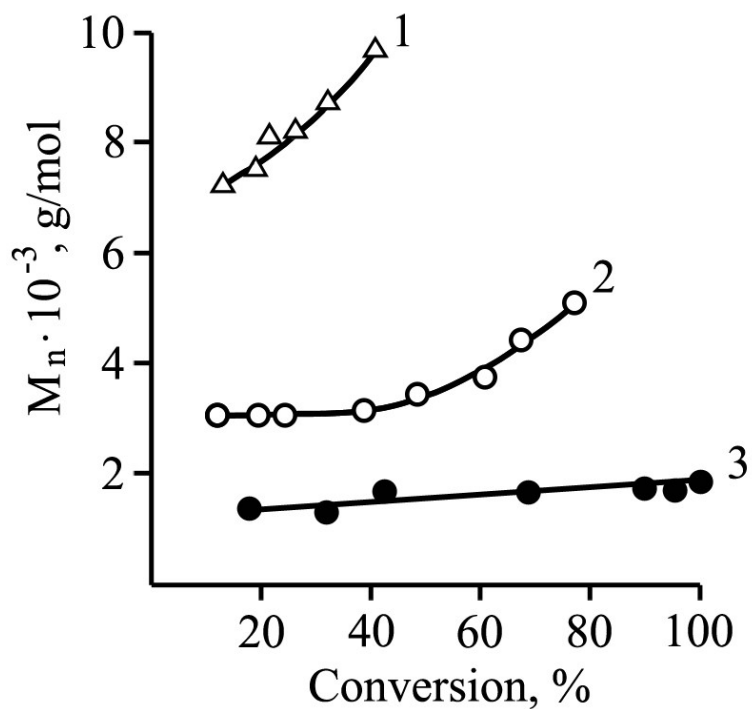

**Fig. S3**  $M_n$  vs. conversion plots for the isoprene polymerization with  ${}^t\text{BuCl}/\text{TiCl}_4$  initiating system in  $\text{CH}_2\text{Cl}_2$  at different temperatures:  $[\text{C}_5\text{H}_8]=4.0$  M;  $[\text{TiCl}_4]=1.5 \cdot 10^{-2}$  M;  ${}^t\text{BuCl}/\text{TiCl}_4=300$ . Temperature:  $-78^\circ\text{C}$  (1),  $-20^\circ\text{C}$  (2) и  $20^\circ\text{C}$  (3).

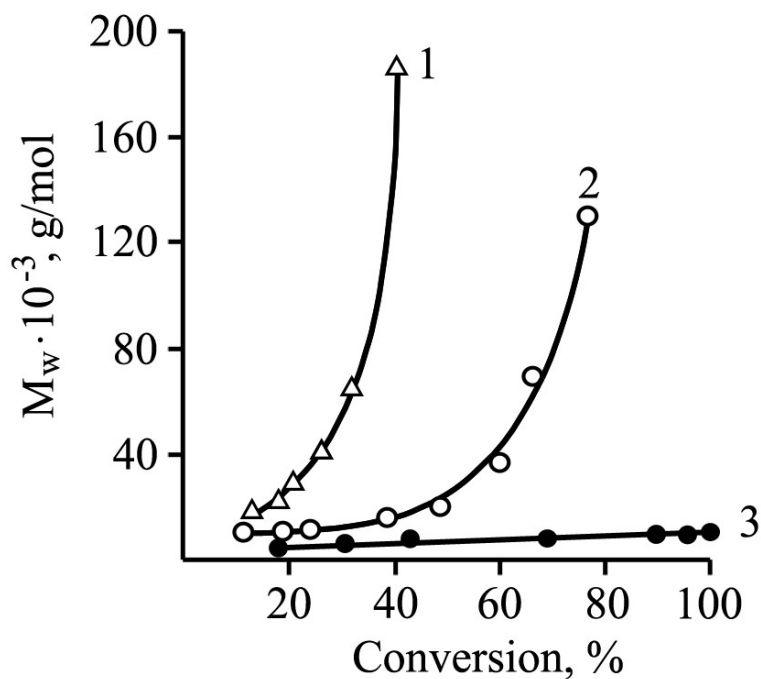

**Fig. S4**  $M_w$  vs. conversion plots for the isoprene polymerization with  ${}^t\text{BuCl}/\text{TiCl}_4$  initiating system in  $\text{CH}_2\text{Cl}_2$  at different temperatures:  $[\text{C}_5\text{H}_8]=4.0$  M;  $[\text{TiCl}_4]=1.5 \cdot 10^{-2}$  M;  ${}^t\text{BuCl}/\text{TiCl}_4=300$ . Temperature:  $-78^\circ\text{C}$  (1),  $-20^\circ\text{C}$  (2) и  $20^\circ\text{C}$ .

**Table S1** Microstructure of the unsaturated part of polyisoprene chain synthesized in CH<sub>2</sub>Cl<sub>2</sub> at different temperatures and monomer conversions <sup>a</sup>

| T<br>(°C) | Yield<br>(%) | Content of structural units (mol%) |                  |                  |      |                  |       |                 |       |
|-----------|--------------|------------------------------------|------------------|------------------|------|------------------|-------|-----------------|-------|
|           |              | <i>trans</i> -1,4                  |                  |                  | 1,2- | 3,4-             |       | EG <sup>b</sup> |       |
|           |              | Total                              | head-to-<br>tail | tail-to-<br>tail |      | head-to-<br>head | total |                 | chain |
| -78       | 13.3         | 93.0                               | 55.0             | 20.0             | 18.0 | 3.5              | 3.5   | 3.0             | 0.5   |
|           | 21.2         | 94.0                               | 55.0             | 20.5             | 18.5 | 3.0              | 3.0   | 2.5             | 0.5   |
|           | 26.5         | 93.0                               | 55.0             | 20.0             | 18.0 | 3.5              | 3.5   | 3.0             | 0.5   |
|           | 32.3         | 94.0                               | 55.0             | 20.5             | 18.5 | 3.0              | 3.0   | 2.5             | 0.5   |
| -20       | 11.7         | 95.0                               | 63.0             | 17.0             | 15.0 | 2.0              | 3.0   | 2.0             | 1.0   |
|           | 19.6         | 95.0                               | 62.0             | 18.0             | 15.0 | 2.0              | 3.0   | 2.0             | 1.0   |
|           | 24.3         | 95.0                               | 61.0             | 18.0             | 16.0 | 2.0              | 3.0   | 2.0             | 1.0   |
|           | 38.6         | 95.0                               | 59.0             | 19.0             | 17.0 | 2.0              | 3.0   | 2.0             | 1.0   |
|           | 77.0         | 95.0                               | 59.0             | 19.0             | 17.0 | 2.0              | 3.0   | 2.0             | 1.0   |
| +20       | 42.8         | 95.0                               | 61               | 18               | 16   | 1.5              | 3.5   | 1.5             | 2.0   |

<sup>a</sup> Polymerization conditions: <sup>t</sup>BuCl/TiCl<sub>4</sub>=300, [C<sub>5</sub>H<sub>8</sub>]=4.0 M, [TiCl<sub>4</sub>]=1.5·10<sup>-2</sup> M. <sup>b</sup>EG: end group

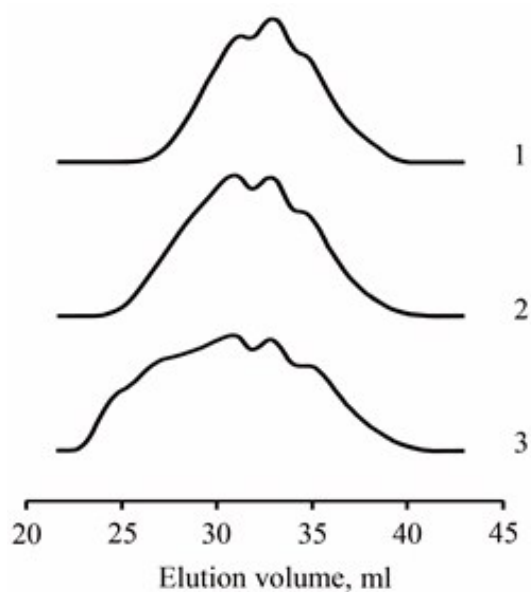

**Fig. S5.** GPC traces of polyisoprene before (1) and after treatment by <sup>t</sup>BuCl/TiCl<sub>4</sub> initiating system during 15 min (2) and 120 min (3). The conditions of treatment are described in Experimental part.

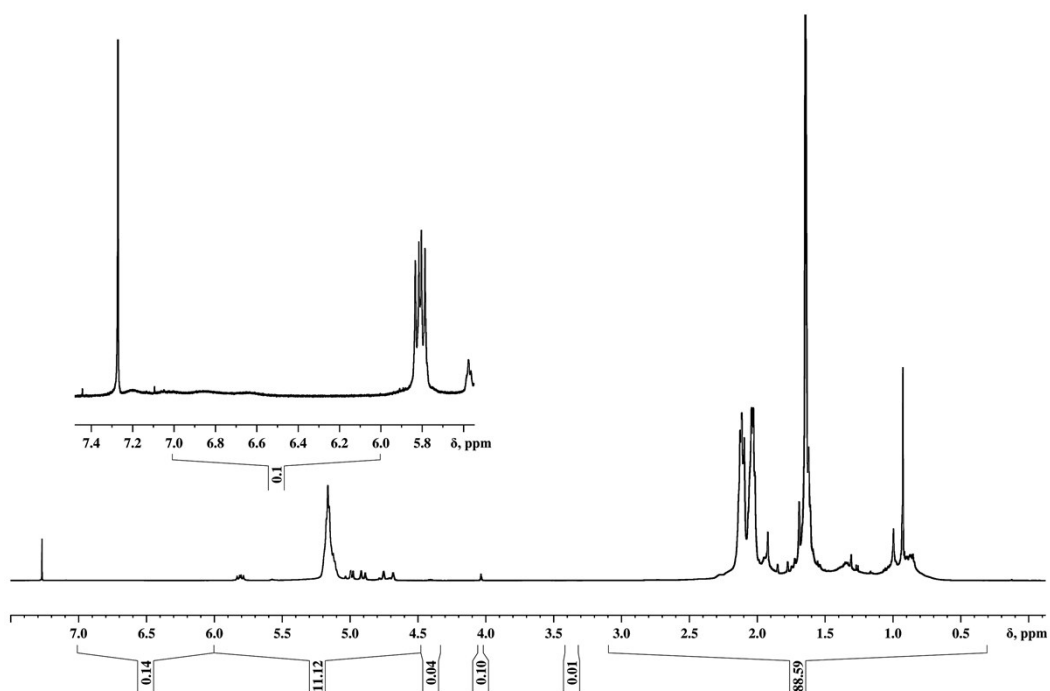

**Fig. S6**  $^1\text{H}$  NMR spectrum of polyisoprene synthesized using  $^t\text{BuCl}/\text{TiCl}_4$  initiating system at  $-78^\circ\text{C}$  (conv.=13.3%):  $^t\text{BuCl}/\text{TiCl}_4=300$ ;  $[\text{C}_5\text{H}_8]=4.0\text{ M}$ ;  $[\text{TiCl}_4]=1.5\cdot 10^{-2}\text{ M}$ .

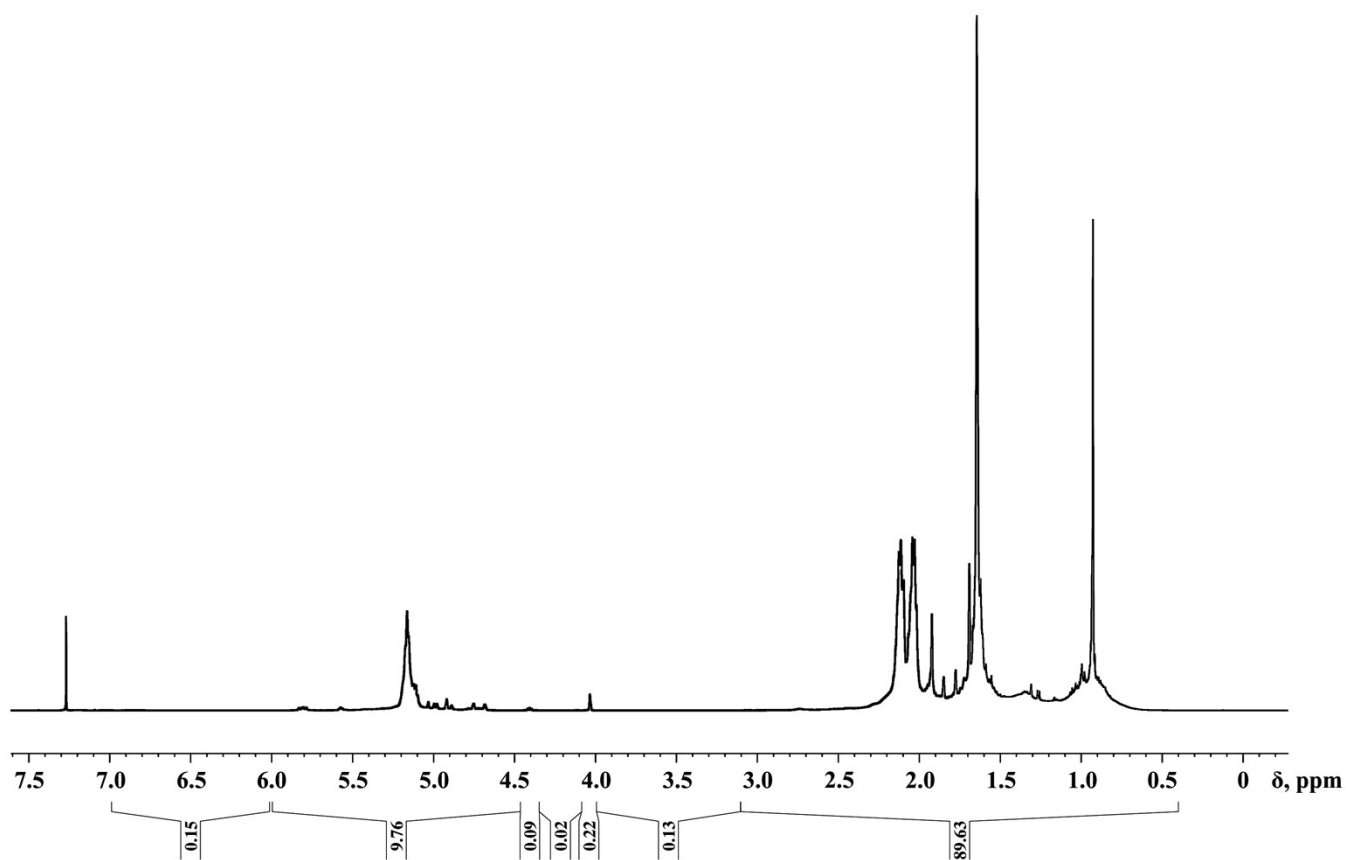

**Fig. S7**  $^1\text{H}$  NMR spectrum of polyisoprene synthesized using  $^t\text{BuCl}/\text{TiCl}_4$  initiating system at  $-20^\circ\text{C}$  (conv.=77.0%):  $^t\text{BuCl}/\text{TiCl}_4=300$ ;  $[\text{C}_5\text{H}_8]=4.0\text{ M}$ ;  $[\text{TiCl}_4]=1.5\cdot 10^{-2}\text{ M}$ .
